# Supplementary material for: The association between air pollution and mortality in Thailand
Source: PubMed Central journal article supplement (PMC4076679; doi:10.1038/srep05509), 2014-07-01
Supplement: srep05509-s1.pdf [file srep05509-s1.pdf]

# Supplemental Material

## The association between air pollution and mortality in Thailand

Yuming Guo<sup>1,2,3\*</sup>, Shanshan Li<sup>1</sup>, Benjawan Tawatsupa<sup>4</sup>, Kornwipa Punnasiri<sup>4</sup>, Jouni J.K.

Jaakkola<sup>3</sup>, Gail Williams<sup>1</sup>

<sup>1</sup> Division of Epidemiology and Biostatistics, School of Population Health, The University of Queensland, Brisbane, Australia;

<sup>2</sup> Shanghai Key Laboratory of Meteorology and Health, Shanghai, China

<sup>3</sup> Center for Environmental and Respiratory Health Research, Institute of Health Sciences, University of Oulu, Oulu, Finland;

<sup>4</sup> Health Impact Assessment Division, Department of Health, Ministry of Public Health, Thailand.

### Corresponding author:

Dr. Yuming Guo, Division of Epidemiology and Biostatistics, School of Population Health, The University of Queensland, Brisbane, QLD 4006, Australia; Telephone: +61 7 3346 5265;

Email address: [y.guo1@uq.edu.au](mailto:y.guo1@uq.edu.au);

## OUTLINE

| Title                                                                                                                                                                                                                                                                                                                                            | Page         |
|--------------------------------------------------------------------------------------------------------------------------------------------------------------------------------------------------------------------------------------------------------------------------------------------------------------------------------------------------|--------------|
| <b>Table S1:</b> Spearman correlation between air pollutants and weather conditions in 18 provinces in Thailand, during 199–2008                                                                                                                                                                                                                 | <b>3 - 4</b> |
| <b>Table S2:</b> Pooled effect estimates (mean and 95% PIs) for the increase in mortality associated with an increase of 10 $\mu\text{g}/\text{m}^3$ in $\text{PM}_{10}$ , 10 ppb in $\text{O}_3$ , 1 ppb in $\text{SO}_2$ in Thailand during 1999–2008, using single pollutant models without controlling for temperature and relative humidity | <b>5</b>     |
| <b>Table S3:</b> Descriptive summary for the study period, daily deaths, air pollutants and weather conditions in 18 provinces in summer (March–June) in Thailand, during 1999–2008                                                                                                                                                              | <b>6</b>     |
| <b>Table S4:</b> Descriptive summary for the study period, daily deaths, air pollutants and weather conditions in 18 provinces in rainy season (July–October) in Thailand, during 1999–2008                                                                                                                                                      | <b>7</b>     |
| <b>Table S5:</b> Descriptive summary for the study period, daily deaths, air pollutants and weather conditions in 18 provinces in winter (November–February) in Thailand, during 1999–2008                                                                                                                                                       | <b>8</b>     |

**Table S1:** Spearman correlation between air pollutants and weather conditions in 18 provinces in Thailand, during 199–2008.

| Province          | Pollutants       | O <sub>3</sub> | SO <sub>2</sub> | Mean temperature | Relative humidity |
|-------------------|------------------|----------------|-----------------|------------------|-------------------|
| Ayutthaya         | PM <sub>10</sub> | 0.67           | 0.17            | -0.39            | -0.69             |
|                   | O <sub>3</sub>   |                | 0.15            | -0.17            | -0.7              |
|                   | SO <sub>2</sub>  |                |                 | 0.11             | -0.08             |
|                   | Mean temperature |                |                 |                  | 0.24              |
| Bangkok           | PM <sub>10</sub> | 0.49           | 0.37            | -0.41            | -0.45             |
|                   | O <sub>3</sub>   |                | 0.05            | -0.13            | -0.63             |
|                   | SO <sub>2</sub>  |                |                 | -0.03            | -0.03             |
|                   | Mean temperature |                |                 |                  | 0.12              |
| Chachoengsao      | PM <sub>10</sub> | 0.44           | 0.21            | -0.57            | -0.43             |
|                   | O <sub>3</sub>   |                | 0.12            | -0.46            | -0.44             |
|                   | SO <sub>2</sub>  |                |                 | -0.15            | -0.09             |
|                   | Mean temperature |                |                 |                  | 0.06              |
| Chiang mai        | PM <sub>10</sub> | 0.53           | 0.29            | -0.14            | -0.59             |
|                   | O <sub>3</sub>   |                | 0.08            | 0.08             | -0.75             |
|                   | SO <sub>2</sub>  |                |                 | -0.02            | -0.19             |
|                   | Mean temperature |                |                 |                  | 0.01              |
| Chon buri         | PM <sub>10</sub> | 0.5            | 0.08            | -0.26            | -0.38             |
|                   | O <sub>3</sub>   |                | -0.07           | -0.43            | -0.64             |
|                   | SO <sub>2</sub>  |                |                 | 0.11             | -0.02             |
|                   | Mean temperature |                |                 |                  | 0.2               |
| Khon kaen         | PM <sub>10</sub> | 0.26           | 0.32            | -0.2             | -0.43             |
|                   | O <sub>3</sub>   |                | -0.02           | 0.12             | -0.59             |
|                   | SO <sub>2</sub>  |                |                 | -0.15            | -0.27             |
|                   | Mean temperature |                |                 |                  | 0.04              |
| Lampang           | PM <sub>10</sub> | 0.67           | 0.22            | 0.01             | -0.66             |
|                   | O <sub>3</sub>   |                | 0.14            | 0.16             | -0.7              |
|                   | SO <sub>2</sub>  |                |                 | -0.02            | -0.13             |
|                   | Mean temperature |                |                 |                  | -0.09             |
| Nakhon sawan      | PM <sub>10</sub> | 0.62           | 0.32            | -0.25            | -0.61             |
|                   | O <sub>3</sub>   |                | 0.28            | -0.04            | -0.68             |
|                   | SO <sub>2</sub>  |                |                 | -0.08            | -0.28             |
|                   | Mean temperature |                |                 |                  | 0.04              |
| Nakhon ratchasima | PM <sub>10</sub> | 0.26           | -0.03           | -0.29            | -0.4              |
|                   | O <sub>3</sub>   |                | 0.06            | -0.05            | -0.56             |
|                   | SO <sub>2</sub>  |                |                 | -0.09            | -0.02             |
|                   | Mean temperature |                |                 |                  | 0.15              |
| Nonthaburi        | PM <sub>10</sub> | 0.54           | 0.35            | -0.51            | -0.51             |
|                   | O <sub>3</sub>   |                | 0.23            | -0.31            | -0.62             |
|                   | SO <sub>2</sub>  |                |                 | -0.2             | -0.11             |
|                   | Mean temperature |                |                 |                  | 0.20              |

|              |                  |      |       |       |       |
|--------------|------------------|------|-------|-------|-------|
| Pathum thani | PM <sub>10</sub> | 0.34 | 0.17  | -0.11 | -0.42 |
|              | O <sub>3</sub>   |      | 0.2   | -0.35 | -0.52 |
|              | SO <sub>2</sub>  |      |       | 0.08  | -0.2  |
|              | Mean temperature |      |       |       | 0.16  |
| Ratchaburi   | PM <sub>10</sub> | 0.69 | 0.42  | -0.58 | -0.23 |
|              | O <sub>3</sub>   |      | 0.38  | -0.46 | -0.42 |
|              | SO <sub>2</sub>  |      |       | -0.31 | -0.22 |
|              | Mean temperature |      |       |       | -0.16 |
| Rayong       | PM <sub>10</sub> | 0.48 | 0.1   | -0.41 | -0.15 |
|              | O <sub>3</sub>   |      | 0.03  | -0.52 | -0.36 |
|              | SO <sub>2</sub>  |      |       | -0.04 | 0.05  |
|              | Mean temperature |      |       |       | -0.18 |
| Samutprakan  | PM <sub>10</sub> | 0.59 | 0.16  | -0.26 | -0.29 |
|              | O <sub>3</sub>   |      | 0.05  | -0.38 | -0.51 |
|              | SO <sub>2</sub>  |      |       | 0.11  | 0.15  |
|              | Mean temperature |      |       |       | 0.18  |
| Samut sakhon | PM <sub>10</sub> | 0.52 | 0.6   | -0.46 | -0.38 |
|              | O <sub>3</sub>   |      | 0.27  | -0.43 | -0.37 |
|              | SO <sub>2</sub>  |      |       | -0.33 | -0.33 |
|              | Mean temperature |      |       |       | 0.13  |
| Saraburi     | PM <sub>10</sub> | 0.26 | 0.12  | -0.31 | -0.23 |
|              | O <sub>3</sub>   |      | 0.28  | -0.38 | -0.54 |
|              | SO <sub>2</sub>  |      |       | -0.31 | -0.22 |
|              | Mean temperature |      |       |       | -0.07 |
| Songkhla     | PM <sub>10</sub> | 0.13 | 0.08  | 0.17  | -0.16 |
|              | O <sub>3</sub>   |      | 0.05  | -0.31 | -0.17 |
|              | SO <sub>2</sub>  |      |       | 0.09  | -0.03 |
|              | Mean temperature |      |       |       | -0.62 |
| Surat thani  | PM <sub>10</sub> | 0.47 | 0.03  | -0.26 | -0.39 |
|              | O <sub>3</sub>   |      | -0.03 | -0.49 | -0.50 |
|              | SO <sub>2</sub>  |      |       | 0.01  | -0.13 |
|              | Mean temperature |      |       |       | 0.15  |

**Table S2:** Pooled effect estimates (mean and 95% posterior intervals) for the increase in mortality associated with an increase of 10  $\mu\text{g}/\text{m}^3$  in  $\text{PM}_{10}$ , 10 ppb in  $\text{O}_3$ , 1 ppb in  $\text{SO}_2$  in Thailand during 1999–2008, using single pollutant models without controlling for temperature and relative humidity.

| Pollutant        | % increase (95% posterior intervals) |                    |                    |
|------------------|--------------------------------------|--------------------|--------------------|
|                  | Non-accidental                       | Cardiovascular     | Respiratory        |
| $\text{PM}_{10}$ | 0.49 (0.3, 0.67)                     | 0.29 (-0.02, 0.61) | 0.40 (0.06, 0.75)  |
| $\text{O}_3$     | 1.26 (0.64, 1.89)                    | 1.88 (0.51, 3.25)  | 1.30 (-0.28, 2.87) |
| $\text{SO}_2$    | 0.38 (0.20, 0.57)                    | 0.28 (-0.08, 0.63) | 0.55 (0.06, 1.05)  |

**Table S3:** Descriptive summary for the study period, daily deaths, air pollutants and weather conditions in 18 provinces in summer (March–June) in Thailand, during 1999–2008

| Province          | Period    | Mean (Standard deviation) |                |             |                  |                |                 |                  |                   |
|-------------------|-----------|---------------------------|----------------|-------------|------------------|----------------|-----------------|------------------|-------------------|
|                   |           | Non-accidental            | Cardiovascular | Respiratory | PM <sub>10</sub> | O <sub>3</sub> | SO <sub>2</sub> | Mean temperature | Relative humidity |
| Ayutthaya         | 1999–2008 | 7 (2.9)                   | 2 (1.3)        | 1 (1.1)     | 52.5 (23.7)      | 25 (8.4)       | 2.8 (1.6)       | 29.9 (1.4)       | 72.4 (8.1)        |
| Bangkok           | 1999–2008 | 67 (10.6)                 | 13 (4.1)       | 8 (3)       | 51.8 (14.3)      | 13.6 (5.9)     | 5.5 (1.7)       | 30.3 (1.4)       | 72.2 (6.4)        |
| Chachoengsao      | 2004–2008 | 6 (2.5)                   | 1 (1)          | 1 (1)       | 30.7 (11.9)      | 26.2 (6.7)     | 1.9 (1.2)       | 27.7 (2.1)       | 73.1 (10.3)       |
| Chiang mai        | 1999–2008 | 21 (5.2)                  | 3 (1.9)        | 3 (1.8)     | 61.5 (48)        | 22.4 (9.7)     | 1.6 (1.3)       | 28.1 (1.7)       | 67.8 (10.7)       |
| Chon buri         | 1999–2008 | 13 (3.9)                  | 2 (1.6)        | 2 (1.3)     | 39.4 (15.5)      | 15.7 (6.6)     | 3.8 (1.8)       | 29.3 (1.1)       | 76.3 (5.2)        |
| Khon kaen         | 1999–2008 | 17 (4.4)                  | 3 (1.7)        | 2 (1.3)     | 35.2 (20.6)      | 20.7 (8)       | 2.3 (1.5)       | 29 (2.1)         | 70.9 (9.4)        |
| Lampang           | 1999–2008 | 11 (3.6)                  | 2 (1.4)        | 1 (1.2)     | 59.9 (45.8)      | 21.1 (10.9)    | 1.2 (1.1)       | 29.5 (1.8)       | 75.4 (10)         |
| Nakhon sawan      | 2000–2008 | 11 (3.6)                  | 3 (1.8)        | 1 (1.2)     | 45.9 (19.9)      | 28.8 (10.8)    | 1.8 (1.5)       | 30.3 (1.8)       | 69.9 (8)          |
| Nakhon ratchasima | 1999–2008 | 21 (5.5)                  | 4 (2.2)        | 3 (1.7)     | 51 (23.7)        | 23.8 (9)       | 2.1 (1.3)       | 28.8 (1.7)       | 70.8 (8.1)        |
| Nonthaburi        | 1999–2008 | 9 (3.2)                   | 2 (1.5)        | 1 (1.3)     | 39.7 (14.1)      | 18 (7.2)       | 4.6 (2)         | 29.5 (1.7)       | 72.9 (9.5)        |
| Pathum thani      | 1999–2008 | 6 (2.9)                   | 1 (1.2)        | 1 (0.9)     | 53.5 (27.8)      | 20.3 (8.6)     | 5.4 (3.1)       | 28.8 (2.3)       | 73.7 (11.2)       |
| Ratchaburi        | 1999–2008 | 8 (3)                     | 2 (1.3)        | 1 (1)       | 36.8 (16.9)      | 20.4 (8.7)     | 3.1 (2.4)       | 28.8 (1.9)       | 67.4 (11.8)       |
| Rayong            | 1999–2008 | 5 (2.3)                   | 1 (1)          | 1 (0.8)     | 38.9 (20.7)      | 16.5 (6.3)     | 4.2 (2.3)       | 27.7 (1.8)       | 70.8 (12.1)       |
| Samutprakan       | 1999–2008 | 8 (3.1)                   | 2 (1.5)        | 1 (1)       | 83.8 (35.1)      | 17.8 (8)       | 7.1 (4)         | 29.1 (1.1)       | 73.3 (5.8)        |
| Samut sakhon      | 1999–2008 | 4 (2.1)                   | 1 (0.9)        | 1 (0.8)     | 38.2 (15)        | 14.4 (7.6)     | 10.2 (6.2)      | 29.2 (1.2)       | 77.2 (5.1)        |
| Saraburi          | 1999–2008 | 6 (2.8)                   | 1 (1.2)        | 1 (1)       | 54.8 (21.5)      | 19 (8.1)       | 2.6 (1.3)       | 29.5 (1.7)       | 73.5 (7.6)        |
| Songkhla          | 1999–2008 | 9 (3.1)                   | 2 (1.5)        | 1 (1.1)     | 38.5 (13)        | 9.1 (5.9)      | 2.4 (2.2)       | 28.6 (1)         | 78.7 (4.2)        |
| Surat thani       | 1999–2008 | 6 (2.6)                   | 1 (1.1)        | 1 (0.9)     | 31.9 (13.4)      | 11.8 (5)       | 2.4 (1.6)       | 29.1 (2.2)       | 69.6 (9.4)        |

**Table S4:** Descriptive summary for the study period, daily deaths, air pollutants and weather conditions in 18 provinces in rainy season (July–October) in Thailand, during 1999–2008

| Province          | Period    | Mean (Standard deviation) |                |             |                  |                |                 |                  |                   |
|-------------------|-----------|---------------------------|----------------|-------------|------------------|----------------|-----------------|------------------|-------------------|
|                   |           | Non-accidental            | Cardiovascular | Respiratory | PM <sub>10</sub> | O <sub>3</sub> | SO <sub>2</sub> | Mean temperature | Relative humidity |
| Ayutthaya         | 1999–2008 | 7 (2.8)                   | 2 (1.3)        | 1 (1.1)     | 42.3 (21.5)      | 16.7 (6.6)     | 2.8 (1.9)       | 28.5 (1)         | 79 (6.1)          |
| Bangkok           | 1999–2008 | 68 (9.7)                  | 14 (4)         | 9 (3)       | 51.3 (13.6)      | 10.7 (4.3)     | 5.6 (1.5)       | 29.4 (1)         | 73.5 (6)          |
| Chachoengsao      | 2004–2008 | 6 (2.5)                   | 1 (1.1)        | 1 (0.9)     | 31.1 (16.2)      | 21.2 (6.2)     | 2.5 (1.4)       | 27 (1.3)         | 79.8 (7.1)        |
| Chiang mai        | 1999–2008 | 21 (5.4)                  | 3 (1.9)        | 3 (1.8)     | 33.9 (14.4)      | 11.7 (3.9)     | 1.5 (1.4)       | 27.3 (1.1)       | 78.7 (4.8)        |
| Chon buri         | 1999–2008 | 13 (3.8)                  | 2 (1.7)        | 2 (1.2)     | 36.5 (11.7)      | 12.9 (6)       | 4.2 (2.4)       | 28.6 (1)         | 78.2 (5.7)        |
| Khon kaen         | 1999–2008 | 17 (4.7)                  | 3 (1.7)        | 2 (1.3)     | 30.9 (16)        | 12.1 (5.2)     | 2.2 (1.5)       | 27.8 (1.2)       | 78.8 (6.2)        |
| Lampang           | 1999–2008 | 10 (3.5)                  | 2 (1.4)        | 1 (1.2)     | 31.3 (12)        | 8.1 (3.1)      | 0.9 (0.7)       | 28.4 (1)         | 83.9 (5)          |
| Nakhon sawan      | 2000–2008 | 11 (3.6)                  | 3 (1.7)        | 1 (1.2)     | 36.9 (15.2)      | 16.6 (6.2)     | 1.2 (1)         | 28.6 (1)         | 77.9 (5.4)        |
| Nakhon ratchasima | 1999–2008 | 20 (5.9)                  | 4 (2.1)        | 2 (1.7)     | 45 (25.4)        | 14.4 (5.3)     | 2.3 (1.7)       | 27.6 (1.2)       | 76.8 (6)          |
| Nonthaburi        | 1999–2008 | 8 (2.9)                   | 2 (1.4)        | 1 (1.2)     | 39.4 (12)        | 13.2 (4.9)     | 4.6 (1.7)       | 28.2 (1.1)       | 81.5 (5.2)        |
| Pathum thani      | 1999–2008 | 7 (2.9)                   | 1 (1.3)        | 1 (1)       | 38 (18.1)        | 14.2 (6.5)     | 4 (1.9)         | 27.9 (1.4)       | 81.7 (7.3)        |
| Ratchaburi        | 1999–2008 | 8 (2.9)                   | 2 (1.3)        | 1 (1)       | 36.2 (18.3)      | 14.3 (6.4)     | 3 (1.6)         | 27.5 (1.2)       | 79.8 (5.3)        |
| Rayong            | 1999–2008 | 5 (2.4)                   | 1 (1)          | 1 (0.8)     | 33.9 (15.1)      | 12.2 (4.7)     | 4.2 (1.9)       | 26.2 (1)         | 82.5 (4.4)        |
| Samutprakan       | 1999–2008 | 8 (3.2)                   | 2 (1.4)        | 1 (1)       | 77 (29.4)        | 13.4 (5.8)     | 6.2 (2.5)       | 28.6 (1)         | 72.7 (5.4)        |
| Samut sakhon      | 1999–2008 | 4 (2.2)                   | 1 (1)          | 1 (0.8)     | 43.6 (16.1)      | 10.3 (5.6)     | 13.8 (5.7)      | 28.8 (1.1)       | 78.2 (6.1)        |
| Saraburi          | 1999–2008 | 6 (2.8)                   | 1 (1.2)        | 1 (0.9)     | 52.2 (25.7)      | 12 (5.6)       | 2.4 (1.3)       | 28.4 (1)         | 80.5 (4.5)        |
| Songkhla          | 1999–2008 | 9 (3.3)                   | 2 (1.4)        | 1 (1)       | 42.8 (18.5)      | 7.2 (4.9)      | 2.4 (1.6)       | 28.2 (1)         | 79.5 (4.9)        |
| Surat thani       | 1999–2008 | 6 (2.9)                   | 1 (1)          | 1 (0.9)     | 24.7 (9.1)       | 8.8 (3)        | 2.1 (1.5)       | 28 (1.3)         | 77.9 (8)          |

**Table S5:** Descriptive summary for the study period, daily deaths, air pollutants and weather conditions in 18 provinces in winter (November–February) in Thailand, during 1999–2008

| Province          | Period    | Mean (Standard deviation) |                |             |                  |                |                 |                  |                   |
|-------------------|-----------|---------------------------|----------------|-------------|------------------|----------------|-----------------|------------------|-------------------|
|                   |           | Non-accidental            | Cardiovascular | Respiratory | PM <sub>10</sub> | O <sub>3</sub> | SO <sub>2</sub> | Mean temperature | Relative humidity |
| Ayutthaya         | 1999–2008 | 7 (3.1)                   | 2 (1.5)        | 1 (1.1)     | 90 (31.8)        | 28.2 (7.9)     | 2.5 (1.4)       | 26.5 (2.2)       | 64.9 (8.2)        |
| Bangkok           | 1999–2008 | 65 (12.1)                 | 14 (4.2)       | 8 (3.2)     | 73.5 (23.9)      | 17 (5.5)       | 6 (2)           | 28 (1.8)         | 65.5 (7.7)        |
| Chachoengsao      | 2004–2008 | 5 (2.2)                   | 1 (1.1)        | 1 (0.8)     | 62.6 (30.3)      | 29.9 (9.7)     | 2.9 (1.9)       | 22.8 (2.9)       | 69.6 (8.2)        |
| Chiang mai        | 1999–2008 | 20 (5.5)                  | 3 (2)          | 3 (1.9)     | 64.8 (32)        | 18.5 (6.8)     | 1.8 (1.3)       | 23.6 (2.2)       | 68.4 (7.8)        |
| Chon buri         | 1999–2008 | 12 (4.1)                  | 3 (1.7)        | 2 (1.3)     | 56.1 (22)        | 25.5 (10.1)    | 3.6 (1.6)       | 27.3 (1.5)       | 69.8 (9.5)        |
| Khon kaen         | 1999–2008 | 16 (5)                    | 3 (1.8)        | 2 (1.3)     | 53.3 (29.8)      | 16.7 (6.4)     | 3.5 (2.8)       | 24.7 (2.8)       | 66.2 (6.4)        |
| Lampang           | 1999–2008 | 10 (3.6)                  | 2 (1.4)        | 1 (1.2)     | 68 (40.2)        | 16.9 (8.2)     | 1.2 (0.8)       | 26 (2.2)         | 73.5 (6.8)        |
| Nakhon sawan      | 2000–2008 | 11 (3.7)                  | 3 (1.8)        | 1 (1.2)     | 67.6 (25.5)      | 30.5 (8)       | 2.4 (1.6)       | 26.9 (2.2)       | 65.9 (7.2)        |
| Nakhon ratchasima | 1999–2008 | 20 (5.9)                  | 4 (2.2)        | 3 (1.7)     | 80.9 (38.8)      | 22.1 (8.6)     | 2.4 (2)         | 25.1 (2.4)       | 66.7 (6.4)        |
| Nonthaburi        | 1999–2008 | 8 (3.3)                   | 2 (1.5)        | 1 (1.2)     | 66.6 (27.5)      | 22.7 (7.7)     | 5.5 (2.6)       | 25.8 (2.4)       | 66.2 (6.9)        |
| Pathum thani      | 1999–2008 | 6 (2.9)                   | 1 (1.2)        | 1 (0.9)     | 58.8 (27)        | 23.9 (8.4)     | 4.9 (2.8)       | 24.2 (2.8)       | 67.7 (7)          |
| Ratchaburi        | 1999–2008 | 8 (3.2)                   | 2 (1.4)        | 1 (1.1)     | 73.2 (29.4)      | 28.6 (8.9)     | 5 (2.8)         | 23.9 (2.5)       | 69.1 (7.9)        |
| Rayong            | 1999–2008 | 5 (2.3)                   | 1 (1)          | 1 (0.8)     | 54.1 (22.4)      | 24.8 (10)      | 4.2 (2)         | 23.5 (2.3)       | 71.9 (8)          |
| Samutprakan       | 1999–2008 | 8 (3.3)                   | 2 (1.4)        | 1 (1.1)     | 124.8 (46.7)     | 24.7 (8.5)     | 6.1 (3.3)       | 27.2 (1.7)       | 67.7 (9.6)        |
| Samut sakhon      | 1999–2008 | 4 (2.2)                   | 1 (0.9)        | 1 (0.8)     | 64 (28.5)        | 22 (8.4)       | 17.8 (9.7)      | 26.6 (1.7)       | 73.8 (7.4)        |
| Saraburi          | 1999–2008 | 6 (2.9)                   | 1 (1.3)        | 1 (1)       | 80.9 (40.3)      | 24.3 (9.1)     | 3.8 (2.2)       | 25.8 (2.4)       | 72.4 (4.7)        |
| Songkhla          | 1999–2008 | 9 (3.2)                   | 2 (1.5)        | 1 (1.1)     | 34.6 (13.9)      | 13.5 (9.1)     | 2.1 (2.3)       | 27 (0.9)         | 80.9 (5.6)        |
| Surat thani       | 1999–2008 | 6 (2.9)                   | 1 (1.1)        | 1 (1)       | 37.7 (14.5)      | 17.7 (9.2)     | 2.2 (1.6)       | 24.7 (2.8)       | 62.6 (5.9)        |
